# Supplementary material
Source: PubMed Central journal article supplement (PMC5805628)
Supplement: NIHMS918084-supplement-1.pdf [file NIHMS918084-supplement-1.pdf]

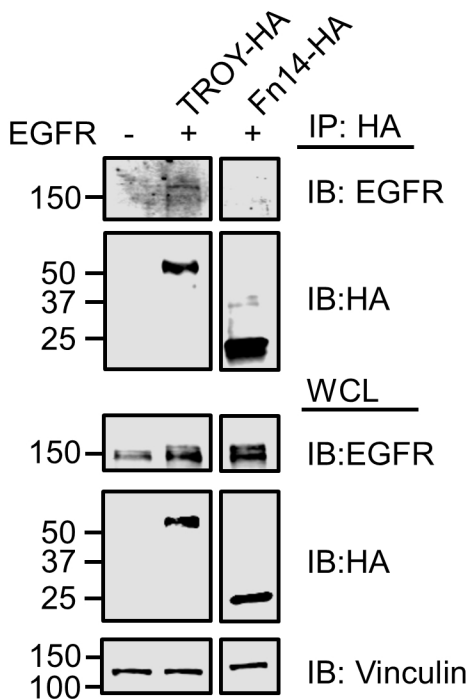

**Supplementary figure 1.** EGFR specifically co-immunoprecipitates with TROY, but not Fn14. Q293 cells were co-transfected with EGFR and TROY-HA or Fn14-HA and 24 hr later cells were lysed and immunoprecipitated with anti-HA antibody. Immunoprecipitates or whole cell lysate (WCL) were immunoblotted (IB) with the indicated antibodies. The positions of molecular standards are shown on the left (in KDa).
